# Supplementary material
Source: Springer Nature journal article supplement (https://www.springermedizin.de/resource/supplementary/12943_2010_715_MOESM11_ESM.pdf/9554644)

**A**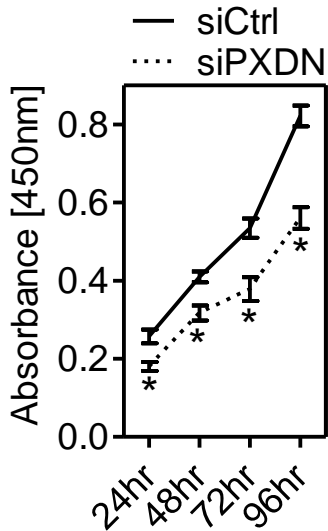**B**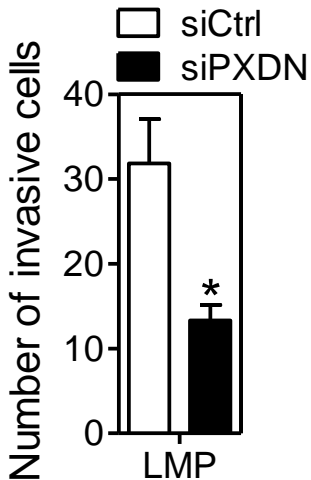

Supplement: MOESM11 [file 9554644]
